# Supplementary material for: Fabrication of an artificial nanosucker device with a large area nanotube array of metallic glass
Source: Royal Society of Chemistry journal article supplement (doi:10.1039/c7nr07360g), 2017-12-11
Supplement: c7nr07360g1.pdf [file c7nr07360g1.pdf]

# **Fabrication of Artificial Nanosucker Device with Metallic Glass Nanotube Arrays Mimicking a Gecko Foot Pad**

Wei-Ting Chen, Karthikeyan Manivannan, Chia-Chi Yu, Jinn P. Chu\*, Jem-Kun

Chen\*

Department of Materials Science and Engineering, National Taiwan University of

Science and Technology, 43, Sec. 4, Keelung Road, Taipei, 106, Taiwan, ROC

\*To whom correspondence should be addressed.

Tel.: +886-2-27376523

Fax: +886-2-27376544

E-mail: [jpchu@mail.ntust.edu.tw](mailto:jpchu@mail.ntust.edu.tw); [jkchen@mail.ntust.edu.tw](mailto:jkchen@mail.ntust.edu.tw)

(a)

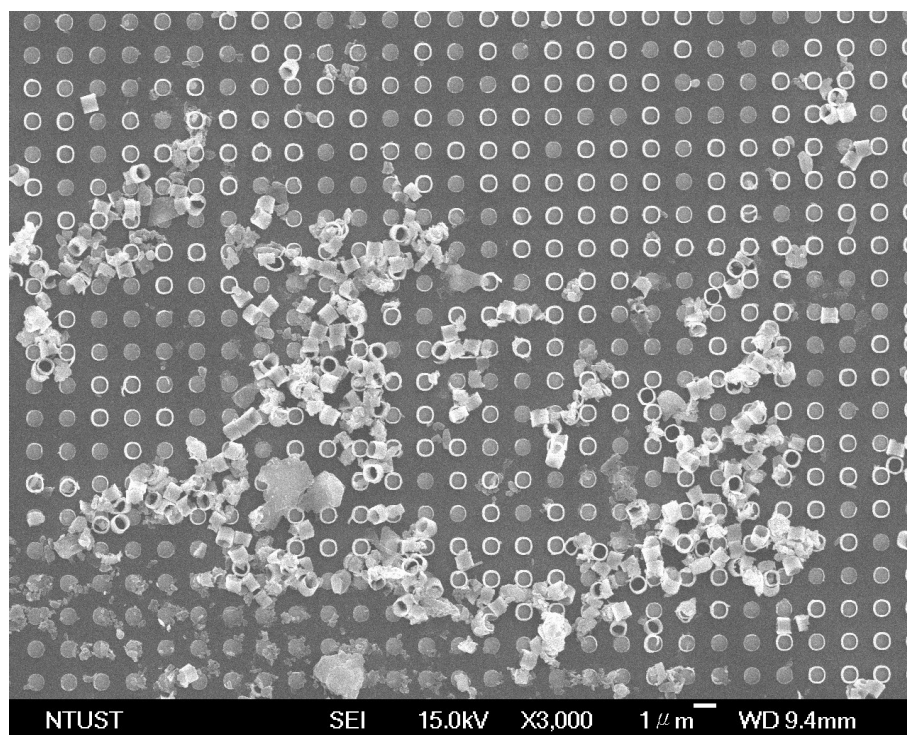

(b)

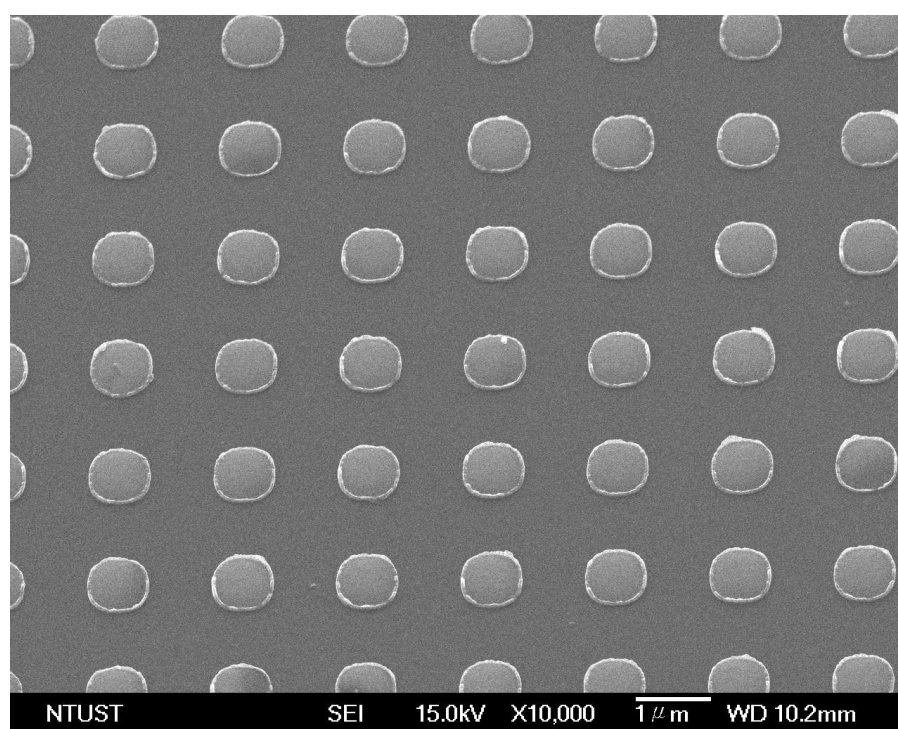

Figure S1 Top-view and titled SEM images of MGNT arrays, deposited for 1125 s, after removal of the photoresist template through ultrasonic cleaning for (a) 45 and (b) 60 sec.
